# Supplementary material
Source: PubMed Central journal article supplement (PMC6735412)
Supplement: jamaneurol-77-35-s001.pdf [file jamaneurol-77-35-s001.pdf]

## Supplementary Online Content

Lee JK, Wu J, Bullen J, et al. Association of cavum septum pellucidum and cavum vergae with cognition, mood, and brain volumes in fighters. *JAMA Neurol*. Published online September 9, 2019. doi:10.1001/jamaneurol.2019.2861

**eAppendix 1.** Professional Fighters Brain Health Study

**eAppendix 2.** Cognitive and Mood Assessments

**eAppendix 3.** Imaging

**eAppendix 4.** Statistics

**eFigure 1.** Measurement of the Cavum Septum Pellucidum (CSP) in the Maximum Transverse Dimension and Measurement of the CSP and Cavum Vergae (CV) in the Maximum Longitudinal Dimension

**eFigure 2.** Example of a Cavum Septum Pellucidum and Cavum Vergae in a Fighter and Example of a Cavum Septum Pellucidum in a Fighter

**eFigure 3.** Scatterplot of Cavum Septum Pellucidum and Cavum Vergae (CSPV) Length and Processing Speed (PSS) Score and Psychomotor Speed (PsychoS) Score Among 251 Fighters With CSPV Length Available

**eFigure 4.** Example of a Patient With Increased Cavum Septum Pellucidum/Cavum Vergae Over Time

**eFigure 5.** Scatterplot of Cavum Septum Pellucidum and Cavum Vergae (CSPV) Length and Processing Speed (PSS) Score and Psychomotor Speed (PsychoS) Score With Only Active Fighters

**eFigure 6.** Scatterplot of Cavum Septum Pellucidum and Cavum Vergae (CSPV) Length and Processing Speed (PSS) Score and Psychomotor Speed (PsychoS) Score With Only Retired Fighters

**eTable 1.** Characteristics of Study Participants

**eTable 2A.** Cognitive Scores Among Fighters With and Without CSP and CV

**eTable 2 B.** Cognitive Scores Among Fighters With and Without WMC and CMH

**eTable 3.** Change in Psychomotor Speed With Increase in Various Brain Volumes Without and With CV

**eTable 4.** Association Between Fighter Exposure Score and Various Imaging Characteristics, Brain Volumes, and Cognitive Scores

**eTable 5.** Correlation Between Changes in CSPV Length and Changes in Various Cognitive/Behavioral Measures

**eTable 6.** Correlation Between Changes in CSPV Length and Changes in Various Brain Volumes

**eTable 7.** Characteristics of Active Versus Retired Fighters

**eTable 8.** Comparison of Imaging and Cognitive Variables in Active Fighters and Controls

**eTable 9.** Estimated Mean Differences for Various Brain Volumes Among Active Fighters With and Without CSP and CV

**eTable 10.** Estimated Change in Mean Brain Volumes With Each 1-mm Enlargement in CSPV Length in Active Fighters

**eTable 11.** Comparison of Imaging and Cognitive Variables in Retired Fighters and Controls

**eTable 12.** Estimated Mean Differences for Various Brain Volumes Among Retired Fighters With and Without CSP and CV

**eTable 13.** Estimated Change in Mean Brain Volumes With Each 1-mm Enlargement in CSPV Length in Retired Fighters

This supplementary material has been provided by the authors to give readers additional information about their work.

**eAppendix 1. Professional Fighters Brain Health Study**

Fighters who enrolled in the study were required to hold a Nevada state license to fight professionally. Study participants also needed to be at least 18 years of age with at least a fourth-grade reading level, fluency in English or Spanish, and a willingness to undergo annual evaluations including 3T brain MRI and blood sampling for genotyping and exploratory biomarker studies. Fighters also completed a structured interview to provide demographic information such as age; years of education; and fight exposure data, such as type of fighter (boxer or mixed martial arts), total number of fights, and years of fighting. Information about race and ethnicity was obtained as defined by the participants and was assessed in case these factors were found to be important variables in predicting injury in fighters. Longitudinal yearly follow-up with repeat imaging is also ongoing, with approximately 40% of fighters participating.

Control participants who enrolled in the study were matched with fighters by age and sex and were required to have no history of trauma (including military service or participation in a sport associated with head injuries such as boxing, football, rugby, hockey, mixed martial arts, wrestling, soccer, or rodeo in high school and beyond).

Medical history was self-reported by both fighters and control participants and included any diagnosed medical conditions; previous surgeries; use of medications, performance-enhancing drugs, or other supplements; and history of recreational drug use.

**eAppendix 2. Cognitive and Mood Assessments**

Mood assessments included tests of depression, impulsivity, and sleepiness. The Barrett Impulsiveness Scale, which consists of 30 questions, was used to assess impulsivity in relation to attention, cognitive instability, motor, perseverance, self-control, and cognitive complexity.<sup>1</sup> Fighters also completed the Epworth Sleepiness Scale, which consists of 8 questions on a 4-point scale evaluating for sleepiness (and distinguishing between sleepiness and feelings of fatigue and weariness).<sup>2</sup> Lastly, fighters completed the Patient Health Questionnaire depression scale, which consists of 10 questions to evaluate for depression severity ranging from minimal to severe depression.<sup>3</sup>

Cognition was assessed using raw scores from CNS Vital Signs (CNS Vital Signs, North Carolina).<sup>4</sup> This is a computerized test that was used to obtain robust and reliable measurements of cognition in the clinical realms of verbal memory, processing speed, psychomotor speed, and reaction time. As part of the CNS Vital Signs evaluation, psychomotor speed was calculated as the finger tapping test right taps average plus the finger tapping test left taps average plus the number of correct responses on the symbol digit coding test; processing speed was calculated as the number of correct responses on the symbol digit coding test minus the number of errors on this test.

### **eAppendix 3. Imaging**

Conventional sagittal 3D magnetization-prepared rapid acquisition with gradient echo (MPRAGE) T1 (voxel size =  $1 \times 1 \times 1.2$  mm; flip angle/repetition time [TR]/echo time [TE]/inversion time [TI] = 9/2300/2.98/900 ms; scan time = 9:14), axial turbo spin-echo (TSE) T2 (voxel size =  $0.8 \times 0.8 \times 4$  mm; TR/TE = 5000/84 ms; 38 slices; scan time = 0:57), axial TSE fluid-attenuated inversion recovery (voxel size =  $0.8 \times 0.8 \times 4$  mm; TR/TE/TI = 7000/81/2220 ms; 38 slices; scan time = 2:36), and axial susceptibility weighted imaging (SWI) (voxel size =  $0.9 \times 0.9 \times 0.9$  mm; TR/TE = 20/27 ms; 36 slices; scan time = 1:17) sequences were used for this study. These sequences have previously been used to identify the presence of cerebral microhemorrhages (CMHs), cavum septum pellucidum (CSP), cavum vergae (CV), and nonspecific white matter changes (WMCs).<sup>5</sup> During this previous analysis, 5 neuroradiologists evaluated for the presence of CMHs and 1 neuroradiologist evaluated for the presence of CSP/CV. CSPs were included only if they measured  $> 2$  mm in length. WMCs were excluded if they were  $< 3$  mm or if they were associated with another abnormality such as a CMH or encephalomalacia. CMHs were well-defined areas of abnormal susceptibility hypointensity that were focal, rounded,  $< 5$  mm, not on the pial or ependymal surface, and not caused by vessel or normal variants such as developmental venous anomalies. Cavernous malformations were also excluded from this definition on the basis of characteristic features seen on SWI and T2 sequences.

Volumetric segmentation was performed on the MPRAGE sequence using the Freesurfer Version 6.0 image analysis suite (<http://surfer.nmr.mgh.harvard.edu/>).<sup>6-17</sup> Procedures for measuring cortical thickness have been validated against histological analysis<sup>18</sup> and manual measurements.<sup>19,20</sup> Freesurfer morphometric procedures have demonstrated good test-retest reliability across scanner manufacturers and across field strengths.<sup>13,17</sup>

The supratentorium is defined as the brain parenchyma located above the tentorium cerebelli and includes the bilateral cerebral hemispheres, basal ganglia, thalami, hypothalami, and the corpus callosum.

For the current analysis, 4 neuroradiologists (J.W., J.L., S.J., P.R.) measured the CSP and CV (CSPV) length (eFigure 1) by following the leaflets of the septum pellucidum posteriorly using the point that the leaflets contacted each other as the end of the CSP, then measuring the length on the sagittal plane anteriorly to posteriorly. If this length extended posterior to the anterior columns of the fornix, this was considered a CV. The transverse dimensions of the CSPs were measured at their greatest point on the coronal plane. The readers were blinded to whether the images belonged to a fighter or a control participant.

The same 4 neuroradiologists performed longitudinal follow-up in participants with reported CSP or CV to evaluate size increases between the first available scan and the last available scan. This analysis was performed using 3D software (AGFA) that aligned the brains to account for differences in head position. The readers were not blinded to the time order of the scans.

#### **eAppendix 4. Statistics**

In a post hoc analysis, the association between CSPV length and the 7 brain volumes of interest was assessed using a series of linear regression models. In each model, the brain volume was the outcome variable, CSPV length was the predictor of interest, and age, education, and total intracranial volume (to account for head size<sup>21</sup>) were included as covariates. *P* values were adjusted for multiple comparisons using Holm's step-down procedure, and a significance level of .05 was applied to the adjusted *P* values.

In a second post hoc analysis, the association between fighting status (fighter vs control) and a number of imaging characteristics, brain volumes, and cognitive scores was assessed using a series of regression models. Logistic regression was used in the case of binary variables (CSP and CV), and linear regression was used for the remaining variables. In each model, the imaging characteristic, brain volume, or cognitive score was the outcome variable, fighting status was the predictor of interest, and age, education, race, and ethnicity were included as covariates. *P* values were adjusted for multiple comparisons using Holm's step-down procedure, and a significance level of .05 was applied to the adjusted *P* values.

In a third post hoc analysis, the hypothesis that the association between brain volume and cognitive score would be different for fighters with versus fighters without CV was assessed by adding an interaction term (brain volume × CV status) to the model. The cognitive scores for psychomotor speed and processing speed were assessed separately.

In a fourth post hoc analysis, the fighter exposure score was calculated as a combination of the number of professional fights and the mean number of professional fights per year.<sup>22</sup> Subsequently, the association between fighter exposure score and a number of imaging characteristics, brain volumes, and cognitive scores was assessed using a series of regression models. Logistic regression was used in the case of binary variables (CSP and CV), and linear regression was used for the remaining variables. In each model, the imaging characteristic, brain volume, or cognitive score was the outcome variable, fighter exposure score was the predictor of interest, and age, education, and total intracranial volume were included as covariates. *P* values were adjusted for multiple comparisons using Holm's step-down procedure, and a significance level of .05 was applied to the adjusted *P* values.

In a fifth post hoc analysis, follow-up data were analyzed. For the subset of fighters with follow-up data available, Spearman's correlation coefficient was calculated to quantify the association between (1) changes in CSPV length and changes in cognitive measures, (2) changes in CSPV length and changes in brain volumes, (3) changes in maximum transverse width of the CSP and changes in cognitive measures, and (4) changes in maximum transverse width of the CSP and changes in brain volumes.

**eFigure 1.** (A) Measurement of the Cavum Septum Pellucidum (CSP) in the Maximum Transverse Dimension (B) Measurement of the CSP and Cavum Vergae (CV) in the Maximum Longitudinal Dimension

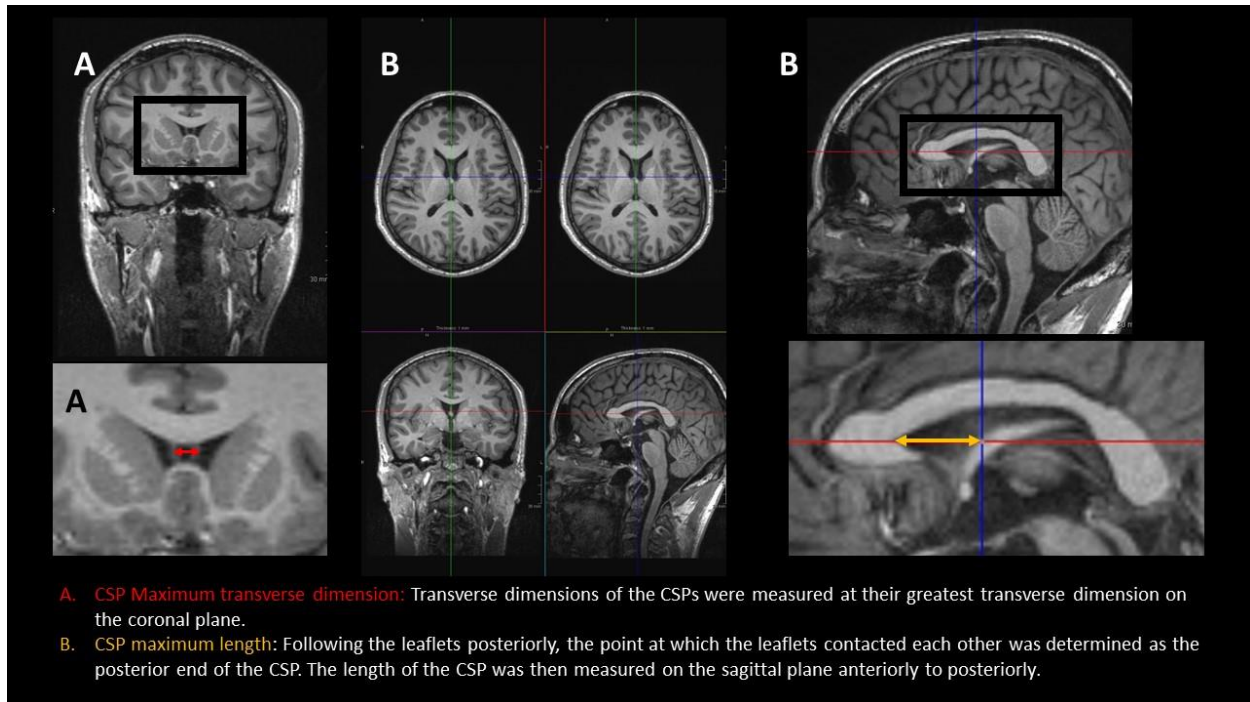

**eFigure 2.** (A) Example of a Cavum Septum Pellucidum and Cavum Vergae in a Fighter. (B) Example of a Cavum Septum Pellucidum in a Fighter

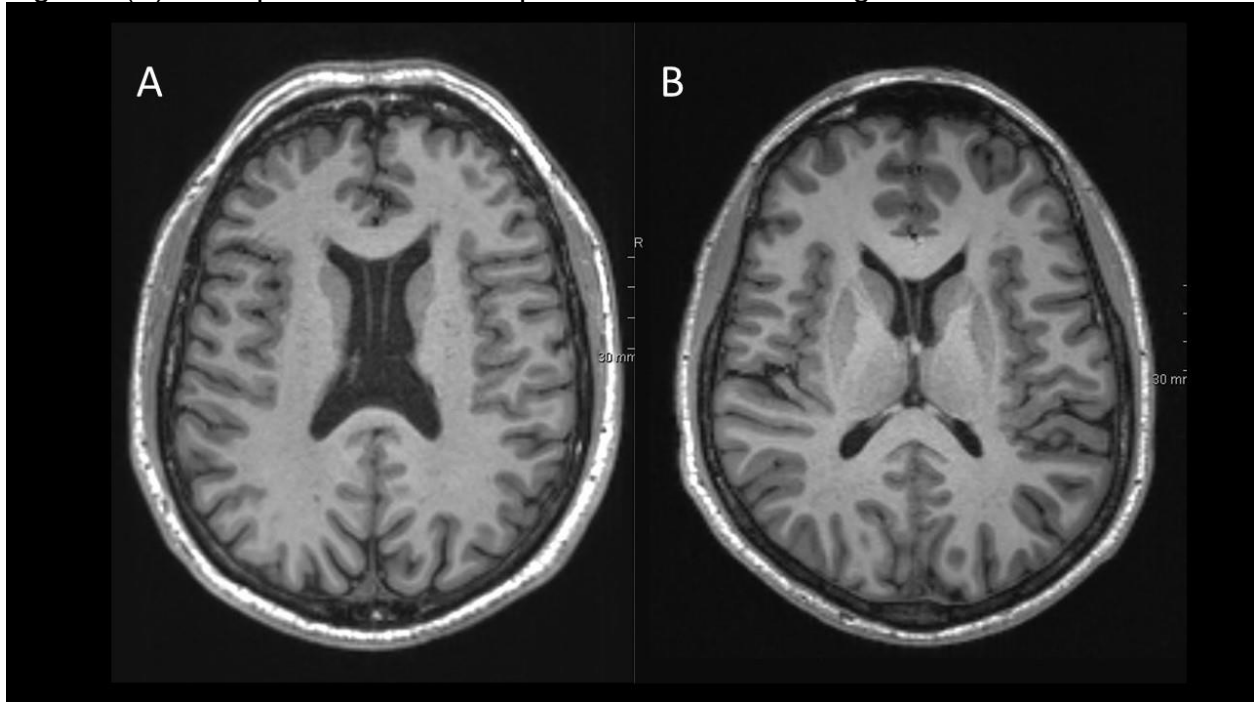

**eFigure 3.** Scatterplot of Cavum Septum Pellucidum and Cavum Vergae (CSPV) Length and Processing Speed (PSS) Score (Left) and Psychomotor Speed (PsychoS) Score (Right) Among 251 Fighters With CSPV Length Available

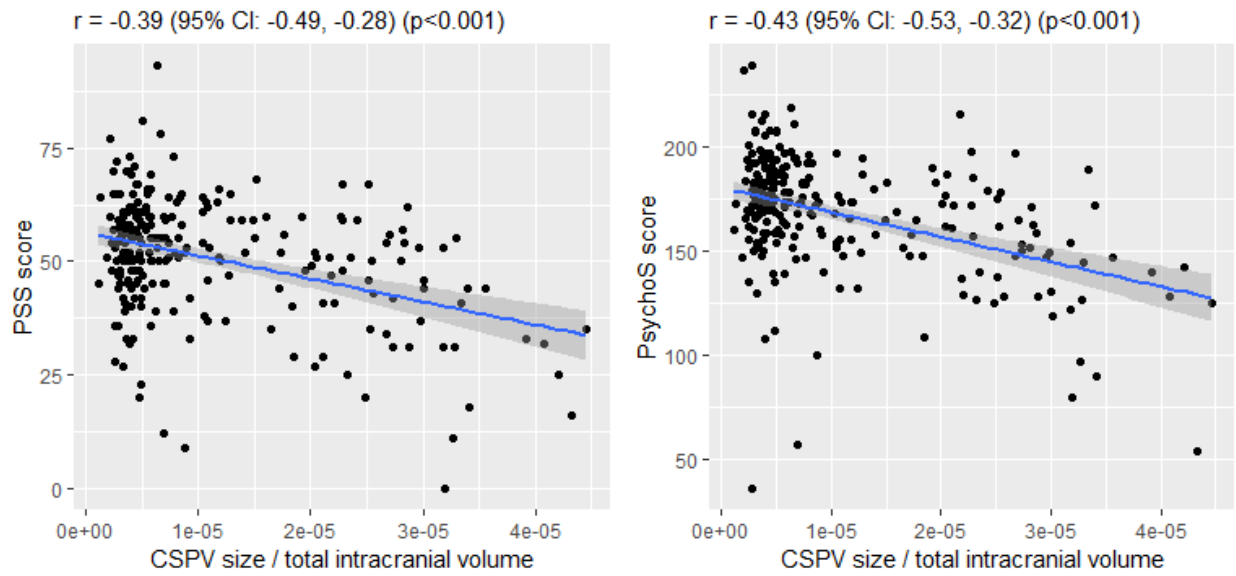



**eFigure 4.** Example of a Patient With Increased Cavum Septum Pellucidum/Cavum Vergae Over Time

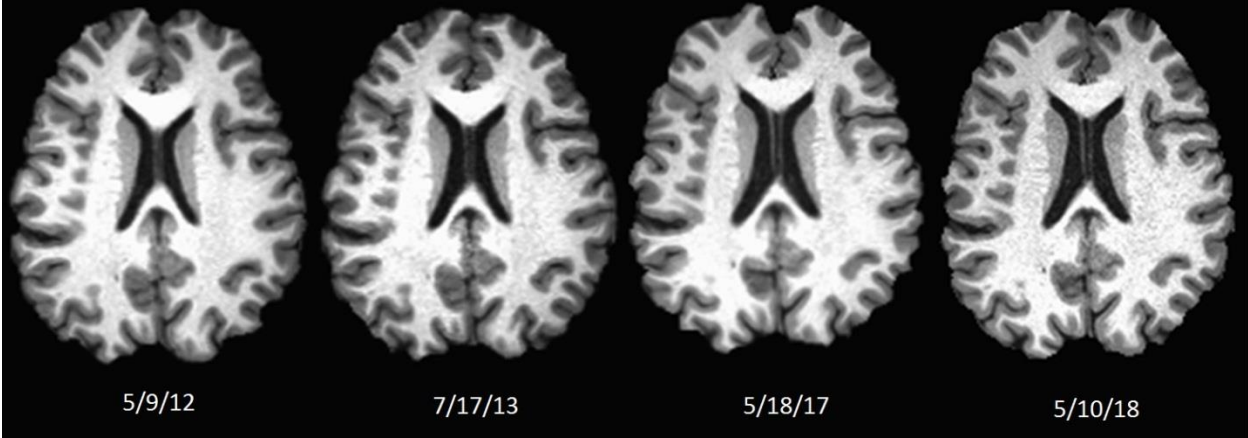

**eFigure 5.** Scatterplot of Cavum Septum Pellucidum and Cavum Vergae (CSPV) Length and Processing Speed (PSS) Score (Left) and Psychomotor Speed (PsychoS) Score (Right) With Only Active Fighters

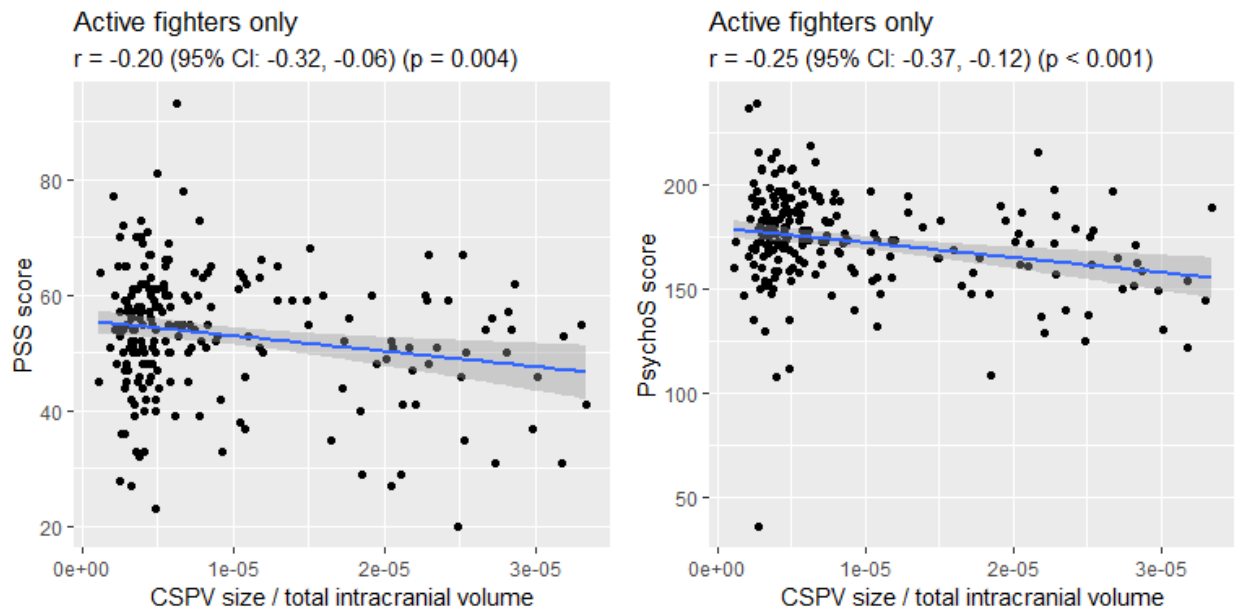

**eFigure 6.** Scatterplot of Cavum Septum Pellucidum and Cavum Vergae (CSPV) Length and Processing Speed (PSS) Score (Left) and Psychomotor Speed (PsychoS) Score (Right) With Only Retired Fighters

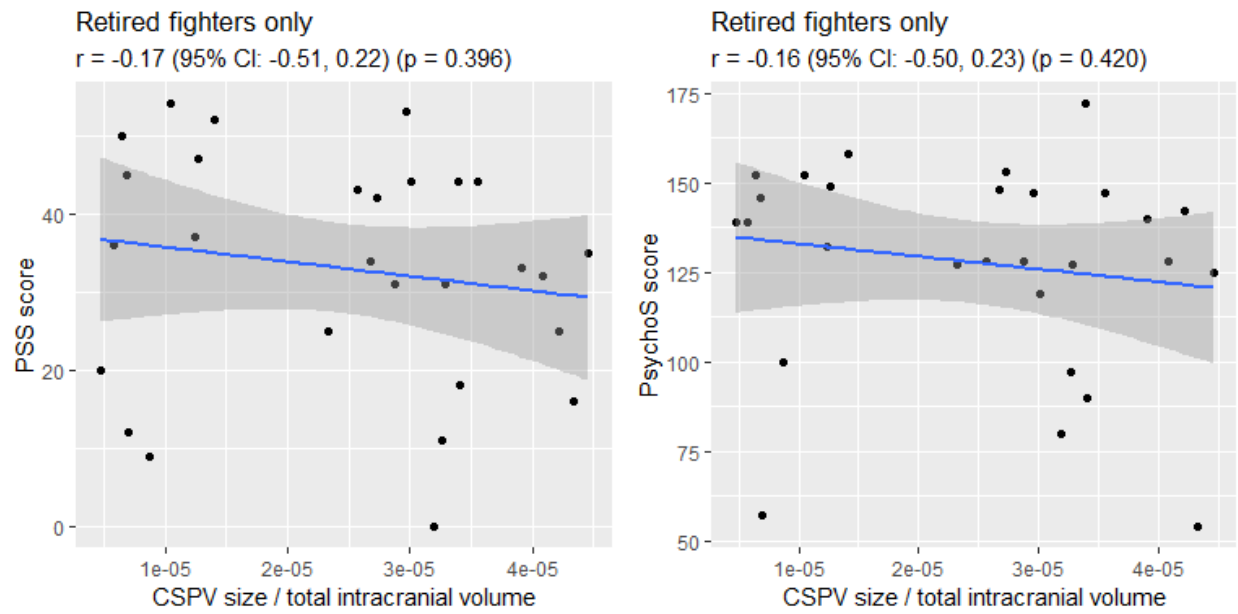

**eTable 1. Characteristics of Study Participants**

| Characteristic                                        | Entire Sample<br>(n = 539) <sup>a</sup> | Fighters<br>(n = 476) <sup>a</sup> | Controls<br>(n = 63) <sup>a</sup> |
|-------------------------------------------------------|-----------------------------------------|------------------------------------|-----------------------------------|
| Age                                                   | 30 (8) [18, 72]                         | 30 (8) [18, 72]                    | 31 (10) [18, 58]                  |
| Years of education                                    | 14 (3) [2, 25]                          | 13 (3) [2, 25]                     | 14 (3) [9, 20]                    |
| Sex                                                   |                                         |                                    |                                   |
| Male                                                  | 497 (92%)                               | 440 (92%)                          | 57 (90%)                          |
| Female                                                | 42 (8%)                                 | 36 (8%)                            | 6 (10%)                           |
| Race <sup>b</sup>                                     |                                         |                                    |                                   |
| White                                                 | 232 (45%)                               | 205 (46%)                          | 27 (43%)                          |
| African American                                      | 134 (26%)                               | 113 (25%)                          | 21 (33%)                          |
| Asian                                                 | 42 (8%)                                 | 34 (8%)                            | 8 (13%)                           |
| Other                                                 | 105 (20%)                               | 99 (22%)                           | 7 (11%)                           |
| Ethnicity <sup>c</sup>                                |                                         |                                    |                                   |
| Hispanic                                              | 127 (28%)                               | 123 (31%)                          | 4 (7%)                            |
| Not Hispanic                                          | 326 (72%)                               | 273 (69%)                          | 53 (93%)                          |
| Fighting status                                       |                                         |                                    |                                   |
| Active                                                | 437 (92%)                               | 437 (92%)                          | --                                |
| Retired                                               | 39 (8%)                                 | 39 (8%)                            | --                                |
| Type of fighter <sup>d</sup>                          |                                         |                                    |                                   |
| 100% boxing                                           | 181 (41%)                               | 181 (41%)                          | --                                |
| 70% boxing                                            | 6 (1%)                                  | 6 (1%)                             | --                                |
| 100% mixed martial arts                               | 196 (45%)                               | 196 (45%)                          | --                                |
| 70% mixed martial arts                                | 10 (2%)                                 | 10 (2%)                            | --                                |
| 100% Martial arts                                     | 28 (6%)                                 | 28 (6%)                            | --                                |
| 70% Martial arts                                      | 2 (<1%)                                 | 2 (<1%)                            | --                                |
| <70% boxing, mixed martial arts, martial arts         | 15 (3%)                                 | 15 (3%)                            | --                                |
| No. of professional fights <sup>e</sup>               | 13 (17) [0,166]                         | 13 (17) [0,166]                    | --                                |
| Mean no. of professional fights per year <sup>f</sup> | 2.2 (2.2) [0, 20.2]                     | 2.2 (2.2) [0, 20.2]                | --                                |
| Total no. of fights <sup>g</sup>                      | 49 (77) [0, 1006]                       | 49 (77) [0, 1006]                  | --                                |

<sup>a</sup>Data presented as mean (SD) or no. of participants (percent).

<sup>b</sup>Race was unknown for 26 participants.

<sup>c</sup>Ethnicity was unknown for 86 participants.

<sup>d</sup>Type of fighter was unknown for 38 fighters.

<sup>e</sup>No. of professional fights was unknown for 3 fighters.

<sup>f</sup>Mean no. of professional fights per year was unknown for 16 fighters.

<sup>g</sup>Total no. of fights was unknown for 25 fighters.

**eTable 2A.** Cognitive Scores Among Fighters With and Without CSP and CV<sup>a</sup>

| Cognitive/Behavioral Measure | CSP             |             |                 |             | CV              |             |                 |             |
|------------------------------|-----------------|-------------|-----------------|-------------|-----------------|-------------|-----------------|-------------|
|                              | Absent          |             | Present         |             | Absent          |             | Present         |             |
|                              | No. of Fighters | Mean (SD)   |
| PHQ9                         | 227             | 2.5 (3.0)   | 243             | 3 (4.3)     | 403             | 2.5 (3.3)   | 67              | 4.3 (5.8)   |
| ESS                          | 227             | 5.3 (3.5)   | 243             | 5.8 (4.2)   | 404             | 5.4 (3.7)   | 66              | 6.1 (4.7)   |
| Attention                    | 221             | 9.8 (2.8)   | 233             | 9.7 (3.3)   | 389             | 9.7 (2.9)   | 65              | 10.1 (3.7)  |
| Motor                        | 221             | 14.8 (3.4)  | 233             | 14.8 (3.2)  | 389             | 14.8 (3.3)  | 65              | 14.5 (3.2)  |
| Self-control                 | 221             | 11.7 (3.4)  | 233             | 12 (3.8)    | 389             | 11.8 (3.3)  | 65              | 12.6 (4.8)  |
| Cognitive complexity         | 221             | 11.8 (2.4)  | 233             | 11.9 (2.5)  | 389             | 11.8 (2.3)  | 65              | 12.4 (2.8)  |
| Perseverance                 | 221             | 6.9 (2.0)   | 233             | 6.7 (1.9)   | 389             | 6.8 (1.9)   | 65              | 6.8 (2.1)   |
| Cognitive instability        | 221             | 5.2 (1.7)   | 233             | 5.2 (1.7)   | 389             | 5.2 (1.7)   | 65              | 5.2 (2.0)   |
| Total impulsivity            | 221             | 60.2 (10.3) | 233             | 60.4 (11.3) | 389             | 60.1 (10.1) | 65              | 61.6 (14.4) |
| Verbal memory                | 225             | 51.3 (5.0)  | 240             | 51 (5.1)    | 401             | 51.3 (4.9)  | 64              | 50.4 (5.7)  |
| Processing speed             | 228             | 53.4 (11.4) | 246             | 50.9 (13.1) | 407             | 53.4 (11.6) | 67              | 44.4 (14.1) |
| Psychomotor speed            | 228             | 175 (20.5)  | 246             | 168 (28)    | 407             | 174 (23.1)  | 67              | 153 (28.6)  |
| Reaction time                | 228             | 698 (97.8)  | 243             | 718 (120)   | 406             | 699 (98.7)  | 65              | 761 (156)   |

Abbreviations: CSP, cavum septum pellucidum; CV, cavum vergae; ESS, Epworth Sleepiness Scale; PHQ9, Patient Health Questionnaire-9.

<sup>a</sup>Analysis not adjusted for any covariates.

**eTable 2B.** Cognitive Scores Among Fighters With and Without WMC and CMH<sup>a</sup>

| Cognitive/Behavioral Measure | WMC             |             |                 |             | CMH             |             |                 |             |
|------------------------------|-----------------|-------------|-----------------|-------------|-----------------|-------------|-----------------|-------------|
|                              | Absent          |             | Present         |             | Absent          |             | Present         |             |
|                              | No. of Fighters | Mean (SD)   |
| PHQ9                         | 357             | 2.4 (3.2)   | 110             | 4.0 (5.1)   | 446             | 2.7 (3.7)   | 20              | 2.6 (3.7)   |
| ESS                          | 357             | 5.4 (3.6)   | 110             | 5.8 (4.5)   | 446             | 5.6 (3.9)   | 20              | 4.0 (2.5)   |
| Attention                    | 345             | 9.6 (3.0)   | 106             | 10.2 (3.2)  | 430             | 9.8 (3.1)   | 20              | 9.4 (2.5)   |
| Motor                        | 345             | 14.6 (3.2)  | 106             | 15.4 (3.5)  | 430             | 14.8 (3.2)  | 20              | 14.6 (4.4)  |
| Self-control                 | 345             | 11.6 (3.4)  | 106             | 12.9 (4.1)  | 430             | 11.9 (3.5)  | 20              | 11.8 (4.3)  |
| Cognitive complexity         | 345             | 11.7 (2.4)  | 106             | 12.6 (2.4)  | 430             | 11.9 (2.4)  | 20              | 11.3 (2.8)  |
| Perseverance                 | 345             | 6.8 (1.9)   | 106             | 6.8 (2.1)   | 430             | 6.8 (1.9)   | 20              | 6.3 (1.7)   |
| Cognitive instability        | 345             | 5.2 (1.7)   | 106             | 5.3 (1.8)   | 430             | 5.2 (1.7)   | 20              | 4.8 (1.5)   |
| Total impulsivity            | 345             | 59.5 (10.4) | 106             | 63.2 (11.6) | 430             | 60.4 (10.7) | 20              | 58.4 (11.7) |
| Verbal memory                | 352             | 51.5 (4.9)  | 110             | 50.2 (5.4)  | 440             | 51.2 (5.0)  | 21              | 52.0 (5.3)  |
| Processing speed             | 361             | 52.8 (12)   | 110             | 49.9 (13.4) | 449             | 52.2 (12.4) | 21              | 50.3 (12.3) |
| Psychomotor speed            | 361             | 172 (22.8)  | 110             | 167 (30.6)  | 449             | 171 (24.9)  | 21              | 169 (26.0)  |
| Reaction time                | 358             | 701 (107)   | 110             | 731 (117)   | 446             | 707 (110)   | 21              | 726 (119)   |

Abbreviations: CMH, cerebral microhemorrhages; ESS, Epworth Sleepiness Scale; PHQ9, Patient Health Questionnaire-9; WMC, white matter changes.

<sup>a</sup>Analysis not adjusted for any covariates.

**eTable 3.** Change in Psychomotor Speed With Increase in Various Brain Volumes Without and With CV<sup>a,b</sup>

| Location    | Estimated change in psychomotor speed with each 100 mm <sup>3</sup> increase in brain volume |                  |
|-------------|----------------------------------------------------------------------------------------------|------------------|
|             | Fighters without CV                                                                          | Fighters with CV |
| Thalamus    | 0.27                                                                                         | 0.53             |
| Caudate     | -0.01                                                                                        | 0.56             |
| Putamen     | -0.07                                                                                        | 0.54             |
| Hippocampus | 0.06                                                                                         | 0.99             |
| Amygdala    | -0.03                                                                                        | 2.15             |

Abbreviations: CV, cavum vergae.

<sup>a</sup>All associations adjusted for age and education

**eTable 4.** Association Between Fighter Exposure Score and Various Imaging Characteristics, Brain Volumes, and Cognitive Scores

| Variable                     | No. of Observations | Estimate (95% CI) <sup>a,b</sup> | P Value <sup>c</sup> |
|------------------------------|---------------------|----------------------------------|----------------------|
| CSP                          | 429                 | 1.08 (0.93, 1.24)                | 1.000                |
| CSPV length                  | 235                 | 0.39 (-0.81, 1.6)                | 1.000                |
| Mean transverse width of CSP | 235                 | 0.01 (-0.11, 0.12)               | 1.000                |
| CV                           | 429                 | 1.10 (0.89, 1.36)                | 1.000                |
| Supratentorial volume        | 429                 | -2960.43 (-6156.36, 235.5)       | .540                 |
| Thalamic volume              | 429                 | -110.35 (-189.9, -30.8)          | .088                 |
| Corpus callosum volume       | 429                 | -28.49 (-60.17, 3.2)             | .540                 |
| Caudate volume               | 429                 | -76.13 (-130.99, -21.27)         | .088                 |
| Putamen volume               | 429                 | -68.91 (-142.61, 4.79)           | .540                 |
| Hippocampal volume           | 429                 | -29.70 (-75.3, 15.9)             | 1.000                |
| Amygdala volume              | 429                 | -24.17 (-48.69, 0.36)            | .487                 |
| Processing speed             | 427                 | -0.78 (-1.5, -0.06)              | .347                 |
| Psychomotor speed            | 427                 | -2.02 (-3.56, -0.47)             | .121                 |

Abbreviations: CSP, cavum septum pellucidum; CSPV, cavum septum pellucidum and cavum vergae; CV, cavum vergae.

<sup>a</sup>Estimates are odds ratios for binary variables (CSP and CV) and slopes for remaining variables.

<sup>b</sup>All associations adjusted for age, education, and total intracranial volume.

<sup>c</sup>P values adjusted for multiple comparisons using Holm's step-down method.



**eTable 5.** Correlation Between Changes in CSPV Length and Changes in Various Cognitive/Behavioral Measures

| <b>Cognitive/Behavioral Measure</b> | <b>No. of Observations</b> | <b>Correlation With Change in CSPV Length (95% CI)<sup>a</sup></b> | <b>P Value</b> | <b>Adjusted P Value</b> |
|-------------------------------------|----------------------------|--------------------------------------------------------------------|----------------|-------------------------|
| PHQ9                                | 123                        | −0.16 (−0.33 to 0.02)                                              | .071           | .923                    |
| ESS                                 | 78                         | 0.02 (−0.22 to 0.25)                                               | .853           | >.99                    |
| Attention                           | 116                        | −0.02 (−0.21 to 0.15)                                              | .840           | >.99                    |
| Motor                               | 116                        | −0.06 (−0.24 to 0.11)                                              | .552           | >.99                    |
| Self-control                        | 116                        | 0.06 (−0.13 to 0.24)                                               | .549           | >.99                    |
| Cognitive complexity                | 116                        | −0.10 (−0.27 to 0.09)                                              | .310           | >.99                    |
| Perseverance                        | 116                        | 0.04 (−0.16 to 0.22)                                               | .705           | >.99                    |
| Cognitive instability               | 116                        | −0.03 (−0.23 to 0.16)                                              | .747           | >.99                    |
| Total impulsivity                   | 116                        | −0.05 (−0.23 to 0.13)                                              | .612           | >.99                    |
| Verbal memory                       | 122                        | −0.13 (−0.29 to 0.05)                                              | .168           | >.99                    |
| Processing speed                    | 125                        | 0.06 (−0.11 to 0.24)                                               | .472           | >.99                    |
| Psychomotor speed                   | 125                        | 0.01 (−0.16 to 0.18)                                               | .873           | >.99                    |
| Reaction time                       | 124                        | −0.08 (−0.26 to 0.11)                                              | .353           | >.99                    |

Abbreviations: CSPV, cavum septum pellucidum and cavum vergae; ESS, Epworth Sleepiness Scale; PHQ9, Patient Health Questionnaire-9.

<sup>a</sup>Correlation is characterized using Spearman's correlation coefficient.

**eTable 6.** Correlation Between Changes in CSPV Length and Changes in Various Brain Volumes

| <b>Volume</b>         | <b>No. of Observations</b> | <b>Correlation With Change in CSPV Length (95% CI)<sup>a</sup></b> | <b>P Value</b> | <b>Adjusted P Value</b> |
|-----------------------|----------------------------|--------------------------------------------------------------------|----------------|-------------------------|
| Thalamus              | 113                        | -0.04 (-0.22 to 0.13)                                              | .636           | >.99                    |
| Corpus callosum       | 113                        | 0.08 (-0.11 to 0.27)                                               | .394           | >.99                    |
| Caudate               | 113                        | -0.10 (-0.30 to 0.09)                                              | .276           | >.99                    |
| Putamen               | 113                        | -0.22 (-0.39 to -0.05)                                             | .017           | .119                    |
| Hippocampus           | 113                        | 0.07 (-0.13 to 0.26)                                               | .469           | >.99                    |
| Amygdala              | 113                        | 0.04 (-0.13 to 0.22)                                               | .705           | >.99                    |
| Supratentorial volume | 113                        | -0.12 (-0.29 to 0.07)                                              | .199           | >.99                    |

Abbreviation: CSPV, cavum septum pellucidum and cavum vergae.

<sup>a</sup>Correlation is characterized using Spearman's correlation coefficient.

**eTable 7.** Characteristics of Active Versus Retired Fighters

| Variable             | Active Fighters |                 | Retired Fighters |                  | P Value         |
|----------------------|-----------------|-----------------|------------------|------------------|-----------------|
|                      | #               | summary         | #                | summary          |                 |
| Age                  | 437             | 28 (6) [18, 32] | 39               | 47 (11) [21, 53] | <b>&lt;.001</b> |
| Male                 | 437             | 402 (92%)       | 39               | 38 (97%)         | .344            |
| Years of education   | 437             | 13 (3) [2, 20]  | 39               | 13 (4) [3, 25]   | .550            |
| Fight Exposure Score | 422             |                 | 38               |                  | <b>&lt;.001</b> |
| 0                    |                 | 98 (23%)        |                  | 1 (3%)           |                 |
| 1                    |                 | 64 (15%)        |                  | 3 (8%)           |                 |
| 2                    |                 | 148 (35%)       |                  | 4 (11%)          |                 |
| 3                    |                 | 1 (<1%)         |                  | 0 (0%)           |                 |
| 4                    |                 | 111 (26%)       |                  | 30 (79%)         |                 |
| Race                 | 413             |                 | 37               |                  | .086            |
| White                |                 | 191 (46%)       |                  | 14 (38%)         |                 |
| African American     |                 | 99 (24%)        |                  | 14 (38%)         |                 |
| Asian                |                 | 34 (8%)         |                  | 0 (0%)           |                 |
| Other                |                 | 89 (22%)        |                  | 9 (24%)          |                 |
| Ethnicity            | 359             |                 | 37               |                  | .853            |
| Hispanic             |                 | 111 (31%)       |                  | 12 (32%)         |                 |
| Not Hispanic         |                 | 248 (69%)       |                  | 25 (68%)         |                 |

<sup>a</sup>Summaries presented as mean (standard deviation) [range] or count (percent).

**eTable 8.** Comparison of Imaging and Cognitive Variables in Active Fighters and Controls

| Variable                                | Active Fighters           |                             | Controls                  |                             | P Value <sup>b</sup> |
|-----------------------------------------|---------------------------|-----------------------------|---------------------------|-----------------------------|----------------------|
|                                         | Total No. of Participants | Observed Value <sup>a</sup> | Total No. of Participants | Observed Value <sup>a</sup> |                      |
| Presence of CSP                         | 437                       | 217 (50%)                   | 63                        | 11 (17%)                    | <b>&lt;.001</b>      |
| Presence of CV                          | 437                       | 47 (11%)                    | 63                        | 0 (0%)                      | <b>.017</b>          |
| CSPV length, mm                         | 221                       | 14 (12)                     | 11                        | 9 (5)                       | 1.000                |
| Mean transverse width of CSP, mm        | 221                       | 3 (1)                       | 11                        | 3 (1)                       | 1.000                |
| Supratentorial volume, mm <sup>3</sup>  | 407                       | 1077055 (96947)             | 62                        | 1054332 (106459)            | .405                 |
| Thalamic volume, mm <sup>3</sup>        | 407                       | 13956 (1484)                | 62                        | 14451 (1465)                | .177                 |
| Corpus callosum volume, mm <sup>3</sup> | 407                       | 3089 (493)                  | 62                        | 3490 (553)                  | <b>&lt;.001</b>      |
| Caudate volume, mm <sup>3</sup>         | 407                       | 7748 (943)                  | 62                        | 7347 (963)                  | <b>.049</b>          |
| Putamen volume, mm <sup>3</sup>         | 407                       | 12082 (1268)                | 62                        | 11059 (1427)                | <b>&lt;.001</b>      |
| Hippocampal volume, mm <sup>3</sup>     | 407                       | 8034 (724)                  | 62                        | 8162 (732)                  | 1.000                |
| Amygdala volume, mm <sup>3</sup>        | 407                       | 3491 (395)                  | 62                        | 3531 (369)                  | 1.000                |
| Processing speed                        | 435                       | 54 (11)                     | 63                        | 61 (16)                     | <b>&lt;.001</b>      |
| Psychomotor speed                       | 435                       | 174 (22)                    | 63                        | 191 (60)                    | <b>.001</b>          |

Abbreviations: CSP, cavum septum pellucidum; CSPV, cavum septum pellucidum and cavum vergae; CV, cavum vergae.

<sup>a</sup>Data presented as mean (SD) or no. of participants (percent).

<sup>b</sup>P values adjusted for multiple comparisons using Holm's step-down method.

**eTable 9.** Estimated Mean Differences for Various Brain Volumes Among Active Fighters With and Without CSP and CV

| Location        | Adjusted Mean Difference in Brain Volume, mm <sup>3</sup> |                      |                                              |                      |
|-----------------|-----------------------------------------------------------|----------------------|----------------------------------------------|----------------------|
|                 | CSP Present vs Absent (95% CI) <sup>a,b</sup>             | P Value <sup>c</sup> | CV Present vs Absent (95% CI) <sup>a,b</sup> | P Value <sup>c</sup> |
| Supratentorium  | 25818 (4416, 47220)                                       | .128                 | -14807 (-49944, 20331)                       | .446                 |
| Thalamus        | -11 (-349, 327)                                           | 1.000                | -572 (-1118, -26)                            | .241                 |
| Corpus callosum | 43 (-68, 154)                                             | 1.000                | -185 (-365, -5)                              | .241                 |
| Caudate         | -94 (-312, 123)                                           | 1.000                | -403 (-755, -52)                             | .173                 |
| Putamen         | 11 (-262, 284)                                            | 1.000                | -359 (-802, 84)                              | .446                 |
| Hippocampus     | 74 (-94, 242)                                             | 1.000                | -207 (-479, 66)                              | .446                 |
| Amygdala        | 48 (-46, 142)                                             | 1.000                | -113 (-265, 40)                              | .446                 |

Abbreviations: CSP, cavum septum pellucidum; CV, cavum vergae.

<sup>a</sup>Positive values indicate higher volumes when the imaging characteristic is present; negative values indicate higher volumes when the imaging characteristic is absent.

<sup>b</sup>Estimates adjusted for age, education, race, and ethnicity.

<sup>c</sup>P values adjusted for multiple comparisons using Holm's step-down method.

**eTable 10.** Estimated Change in Mean Brain Volumes With Each 1-mm Enlargement in CSPV Length in Active Fighters

| Location        | Estimated Change in Brain Volume With Each 1-mm Increase in CSPV Length, mm <sup>3</sup> (95% CI) <sup>a,b</sup> | P Value <sup>c</sup> |
|-----------------|------------------------------------------------------------------------------------------------------------------|----------------------|
| Supratentorium  | -1104 (-1746, -461)                                                                                              | <b>.006</b>          |
| Thalamus        | -25 (-40, -10)                                                                                                   | <b>.006</b>          |
| Corpus callosum | -12 (-18, -6)                                                                                                    | <b>.000</b>          |
| Caudate         | -16 (-26, -6)                                                                                                    | <b>.012</b>          |
| Putamen         | -14 (-28, 0)                                                                                                     | .096                 |
| Hippocampus     | -8 (-17, 1)                                                                                                      | .096                 |
| Amygdala        | -6 (-11, -1)                                                                                                     | <b>.033</b>          |

Abbreviation: CSPV, cavum septum pellucidum and cavum vergae.

<sup>a</sup>Positive values indicate higher volumes when CSPV length increases; negative values indicate lower volumes when CSPV length increases.

<sup>b</sup>Estimates adjusted for age, education, race, ethnicity, and total intracranial volume.

<sup>c</sup>P values adjusted for multiple comparisons using Holm's step-down method

**eTable 11.** Comparison of Imaging and Cognitive Variables in Retired Fighters and Controls

| Variable                                | Retired Fighters          |                             | Controls                  |                             | P Value <sup>b</sup> |
|-----------------------------------------|---------------------------|-----------------------------|---------------------------|-----------------------------|----------------------|
|                                         | Total No. of Participants | Observed Value <sup>a</sup> | Total No. of Participants | Observed Value <sup>a</sup> |                      |
| Presence of CSP                         | 39                        | 30 (77%)                    | 63                        | 11 (17%)                    | <b>.003</b>          |
| Presence of CV                          | 39                        | 20 (51%)                    | 63                        | 0 (0%)                      | <b>&lt;.001</b>      |
| CSPV length, mm                         | 30                        | 35 (17)                     | 11                        | 9 (5)                       | <b>.018</b>          |
| Mean transverse width of CSP, mm        | 30                        | 5 (2)                       | 11                        | 3 (1)                       | .222                 |
| Supratentorial volume, mm <sup>3</sup>  | 34                        | 937455 (112095)             | 62                        | 1054332 (106459)            | .214                 |
| Thalamic volume, mm <sup>3</sup>        | 34                        | 11136 (1883)                | 62                        | 14451 (1465)                | <b>&lt;.001</b>      |
| Corpus callosum volume, mm <sup>3</sup> | 34                        | 2409 (682)                  | 62                        | 3490 (553)                  | <b>.001</b>          |
| Caudate volume, mm <sup>3</sup>         | 34                        | 6591 (1183)                 | 62                        | 7347 (963)                  | .866                 |
| Putamen volume, mm <sup>3</sup>         | 34                        | 9950 (1604)                 | 62                        | 11059 (1427)                | .866                 |
| Hippocampal volume, mm <sup>3</sup>     | 34                        | 6852 (929)                  | 62                        | 8162 (732)                  | <b>.001</b>          |
| Amygdala volume, mm <sup>3</sup>        | 34                        | 2834 (512)                  | 62                        | 3531 (369)                  | <b>&lt;.001</b>      |
| Processing speed                        | 39                        | 36 (14)                     | 63                        | 61 (16)                     | <b>.006</b>          |
| Psychomotor speed                       | 39                        | 135 (28)                    | 63                        | 191 (60)                    | <b>.012</b>          |

Abbreviations: CSP, cavum septum pellucidum; CSPV, cavum septum pellucidum and cavum vergae; CV, cavum vergae.

<sup>a</sup>Data presented as mean (SD) or no. of participants (percent).

<sup>b</sup>P values adjusted for multiple comparisons using Holm's step-down method.

**eTable 12.** Estimated Mean Differences for Various Brain Volumes Among Retired Fighters With and Without CSP and CV

| Location        | Adjusted Mean Difference in Brain Volume, mm <sup>3</sup> |                      |                                              |                      |
|-----------------|-----------------------------------------------------------|----------------------|----------------------------------------------|----------------------|
|                 | CSP Present vs Absent (95% CI) <sup>a,b</sup>             | P Value <sup>c</sup> | CV Present vs Absent (95% CI) <sup>a,b</sup> | P Value <sup>c</sup> |
| Supratentorium  | -31936 (-145444, 81572)                                   | 1.000                | -58786 (-131067, 13495)                      | .636                 |
| Thalamus        | -682 (-2648, 1284)                                        | 1.000                | -341 (-1665, 983)                            | 1.000                |
| Corpus callosum | -158 (-1070, 754)                                         | 1.000                | -245 (-849, 359)                             | 1.000                |
| Caudate         | -803 (-2145, 538)                                         | 1.000                | -394 (-1306, 519)                            | 1.000                |
| Putamen         | -1073 (-3039, 892)                                        | 1.000                | -1165 (-2421, 91)                            | .472                 |
| Hippocampus     | -726 (-1842, 391)                                         | 1.000                | -551 (-1291, 189)                            | .685                 |
| Amygdala        | -199 (-834, 436)                                          | 1.000                | -264 (-678, 150)                             | .798                 |

Abbreviations: CSP, cavum septum pellucidum; CV, cavum vergae.

<sup>a</sup>Positive values indicate higher volumes when the imaging characteristic is present; negative values indicate higher volumes when the imaging characteristic is absent.

<sup>b</sup>Estimates adjusted for age, education, race, and ethnicity.

<sup>c</sup>P values adjusted for multiple comparisons using Holm's step-down method.



**eTable 13.** Estimated Change in Mean Brain Volumes With Each 1-mm Enlargement in CSPV Length in Retired Fighters

| <b>Location</b> | <b>Estimated Change in Brain Volume With Each 1-mm Increase in CSPV Length, mm<sup>3</sup> (95% CI)<sup>a,b</sup></b> | <b>P Value<sup>c</sup></b> |
|-----------------|-----------------------------------------------------------------------------------------------------------------------|----------------------------|
| Supratentorium  | -954 (-2932, 1024)                                                                                                    | 1.000                      |
| Thalamus        | -10 (-50, 30)                                                                                                         | 1.000                      |
| Corpus callosum | -7 (-26, 12)                                                                                                          | 1.000                      |
| Caudate         | -2 (-29, 25)                                                                                                          | 1.000                      |
| Putamen         | -34 (-73, 5)                                                                                                          | .588                       |
| Hippocampus     | -12 (-35, 11)                                                                                                         | 1.000                      |
| Amygdala        | -5 (-17, 8)                                                                                                           | 1.000                      |

Abbreviation: CSPV, cavum septum pellucidum and cavum vergae.

<sup>a</sup>Positive values indicate higher volumes when CSPV length increases; negative values indicate lower volumes when CSPV length increases.

<sup>b</sup>Estimates adjusted for age, education, race, ethnicity, and total intracranial volume.

<sup>c</sup>P values adjusted for multiple comparisons using Holm's step-down method

## eReferences

1. Stanford MS, Mathias CW, Dougherty DM, Lake SL, Anderson NE, Patton JH. Fifty years of the Barratt Impulsiveness Scale: An update and review. *Pers Individ Dif*. 2009;47(5):385-395.
2. Johns MW. Reliability and factor analysis of the Epworth Sleepiness Scale. *Sleep*. 1992;15(4):376-381.
3. Kroenke K, Spitzer RL, Williams JB. The PHQ-9: validity of a brief depression severity measure. *J Gen Intern Med*. 2001;16(9):606-613.
4. Gualtieri CT, Johnson LG. Reliability and validity of a computerized neurocognitive test battery, CNS Vital Signs. *Arch Clin Neuropsychol*. 2006;21(7):623-643.
5. Lee J, Wu J, Banks S, et al. Prevalence of traumatic findings on routine MRI in a large cohort of professional fighters. *AJNR Am J Neuroradiol*. 2017;38(7):1303-1310.
6. Dale AM, Fischl B, Sereno MI. Cortical surface-based analysis: I. Segmentation and surface reconstruction. *Neuroimage*. 1999;9(2):179-194.
7. Dale AM, Sereno MI. Improved localization of cortical activity by combining EEG and MEG with MRI cortical surface reconstruction: a linear approach. *J Cogn Neurosci*. 1993;5(2):162-176.
8. Fischl B, Dale AM. Measuring the thickness of the human cerebral cortex from magnetic resonance images. *Proc Natl Acad Sci U S A*. 2000;97(20):11050-11055.
9. Fischl B, Liu A, Dale AM. Automated manifold surgery: constructing geometrically accurate and topologically correct models of the human cerebral cortex. *IEEE Trans Med Imaging*. 2001;20(1):70-80.
10. Fischl B, Salat DH, Busa E, et al. Whole brain segmentation: automated labeling of neuroanatomical structures in the human brain. *Neuron*. 2002;33(3):341-355.
11. Fischl B, Van Der Kouwe A, Destrieux C, et al. Automatically parcellating the human cerebral cortex. *Cereb Cortex*. 2004;14(1):11-22.
12. Fischl B, Sereno MI, Dale AM. Cortical surface-based analysis: II: inflation, flattening, and a surface-based coordinate system. *Neuroimage*. 1999;9(2):195-207.
13. Han X, Jovicich J, Salat D, et al. Reliability of MRI-derived measurements of human cerebral cortical thickness: the effects of field strength, scanner upgrade and manufacturer. *Neuroimage*. 2006;32(1):180-194.
14. Jovicich J, Czanner S, Greve D, et al. Reliability in multi-site structural MRI studies: effects of gradient non-linearity correction on phantom and human data. *Neuroimage*. 2006;30(2):436-443.
15. Ségonne F, Dale AM, Busa E, et al. A hybrid approach to the skull stripping problem in MRI. *Neuroimage*. 2004;22(3):1060-1075.
16. Reuter M, Fischl B. Avoiding asymmetry-induced bias in longitudinal image processing. *Neuroimage*. 2011;57(1):19-21.
17. Reuter M, Schmansky NJ, Rosas HD, Fischl B. Within-subject template estimation for unbiased longitudinal image analysis. *Neuroimage*. 2012;61(4):1402-1418.
18. Rosas H, Liu A, Hersch S, et al. Regional and progressive thinning of the cortical ribbon in Huntington's disease. *Neurology*. 2002;58(5):695-701.
19. Kuperberg GR, Broome MR, McGuire PK, et al. Regionally localized thinning of the cerebral cortex in schizophrenia. *Arch General Psychiatry*. 2003;60(9):878-888.
20. Salat DH, Buckner RL, Snyder AZ, et al. Thinning of the cerebral cortex in aging. *Cereb Cortex*. 2004;14(7):721-730.
21. Koerte IK, Hufschmidt J, Muehlmann M, et al. Cavum septi pellucidi in symptomatic former professional football players. *J Neurotrauma*. 2016;33(4):346-353.
22. Bernick C, Banks SJ, Shin W, et al. Repeated head trauma is associated with smaller thalamic volumes and slower processing speed: the Professional Fighters' Brain Health Study. *Br J Sports Med*. 2015:bjsports-2014-093877.
